# Supplementary material for: COVID-19 Diagnosis: A Comprehensive Review of the RT-qPCR Method for Detection of SARS-CoV-2
Source: MDPI journal article supplement (doi:10.3390/diagnostics12061503), 2022-06-20
Supplement: s1 [file s1]

**Table S1.** Overview of RT-PCR kits for the diagnosis of COVID-19, approved by FDA under an emergency use authorization (EUA).

| S. No. | Name of Kit                                                                | Manufacturer                                                                                | Target Genes          | Specimens Used                                                                                |
|--------|----------------------------------------------------------------------------|---------------------------------------------------------------------------------------------|-----------------------|-----------------------------------------------------------------------------------------------|
| 1.     | FOSUN COVID-19 RT-PCR detection kit                                        | Fosun Pharma USA Inc.                                                                       | E, N and ORF1ab genes | AN, MT, NP, OP swabs, sputum, lower respiratory tract aspirates, BAL, nasal, NP wash/aspirate |
| 2.     | TRUPCR SARS-CoV-2 RT-qPCR kit                                              | 3B BlackBio Biotech                                                                         | E, N and RdRP genes   | NP, OP, AN, MT swabs, NP aspirates/washes or nasal aspirates, BAL                             |
| 3.     | COVID-19 RT-PCR Test                                                       | Laboratory Corporation of America (LabCorp)                                                 | N1, N2, and N3 genes  | Nasal, NP, OP swabs, Sputum, BAL, Nasal swabs                                                 |
| 4.     | CRL Rapid Response                                                         | Clinical Reference Laboratory, Inc.                                                         | RdRp gene             | Saliva                                                                                        |
| 5.     | OSUWMC COVID-19 RT-PCR test                                                | The Ohio State University Wexner Medical Center                                             | N1 and N2 genes       | Nasal, OP, NP swabs                                                                           |
| 6.     | Omni COVID-19 Assay by RT-PCR                                              | Omnipathology Solutions Medical Corporation                                                 | N1 and N2 genes       | NP, OP, AN, MT swabs, NP wash/aspirate, nasal aspirate, BAL                                   |
| 7.     | TaqPath COVID-19 Combo Kit                                                 | Thermo Fisher Scientific                                                                    | S and N genes         | NP swab, NP aspirate, BAL                                                                     |
| 8.     | Lilly SARS-CoV-2 Assay                                                     | Eli Lilly and Company                                                                       | N1 and N2 genes       | NP, OP, AN, MT swabs, nasal wash/aspirate, BAL                                                |
| 9.     | SNL-NM 2019 nCoV Real-Time RT-PCR Diagnostic Assay                         | Sandia National Laboratories                                                                | N gene                | NP, OP, AN, MT swabs, nasal wash/aspirate, BAL                                                |
| 10.    | CRSP SARS-CoV-2 Real-time Reverse Transcriptase (RT)- PCR Diagnostic Assay | Clinical Research Sequencing Platform (CRSP), LLC at the Broad Institute of MIT and Harvard | N1 and N2 genes       | NP, OP, AN, MT swabs, nasal, NP wash/aspirate, BAL                                            |
| 11.    | LabGun™ COVID-19 RT-PCR Kit                                                | LabGenomics Co., Ltd.                                                                       | E and RdRp genes      | NP, OP, AN, MT swabs, nasal, NP wash/aspirate, sputum                                         |
| 12.    | Real-Time Fluorescent RT-PCR Kit for Detecting SARS-2019-nCoV              | BGI Genomics Co. Ltd                                                                        | ORF1ab gene           | OP, NP, AN, MT, nasal swabs, nasal wash/aspirate, BAL                                         |
| 13.    | AvellinoCoV2 test                                                          | Avellino Lab USA, Inc.                                                                      | N1 and N3 genes       | NP, OP swabs                                                                                  |

|     |                                                   |                               |                                              |                                                              |
|-----|---------------------------------------------------|-------------------------------|----------------------------------------------|--------------------------------------------------------------|
| 14. | Alinity m SARS-CoV-2 assay                        | Abbott Molecular Inc.         | RdRp and N genes                             | NP, OP swabs, BAL                                            |
| 15. | 1COPY COVID-19 qPCR multi kit                     | 1DROP INC                     | E and RdRp genes                             | NP, OP, AN, MT, swabs, nasal, NP wash/aspirate               |
| 16. | Laboratorio ClinicoToledo SARS-CoV-2 Assay        | Laboratorio Clinico Toledo    | N and E genes                                | Nasal, NP, MT, OP, BAL swabs                                 |
| 17. | Inform Diagnostics SARS-CoV-2 RT-PCR Assay        | Inform Diagnostics, Inc.      | N1 and N2 genes                              | NP, OP, AN, MT swabs, NP wash/aspirate, nasal/aspirates, BAL |
| 18. | Acupath COVID-19 Real-Time (RT-PCR) Assay         | Acupath Laboratories, Inc.    | ORF1ab, N, and S genes                       | NP swab, NP aspirate, BAL                                    |
| 19. | Gene By Gene SARS-CoV-2 Detection Test            | Gene By Gene                  | N1 and N2 genes                              | NP, nasal swabs                                              |
| 20. | Alinity m Resp-4-Plex                             | Abbott Molecular              | RdRp and N genes and Influenza A & B and RSH | NP swabs                                                     |
| 21. | Abbott RealTime SARS-CoV-2 assay                  | Abbott Molecular              | RdRp and N genes                             | NP, OP, nasal swabs                                          |
| 22. | DTPM COVID-19 RT-PCR test                         | Tide Laboratories, LLC        | N gene                                       | NP, OP, MT swabs                                             |
| 23. | MassARRAY® SARS-CoV-2 Panel                       | Agena Bioscience, Inc.        | N genes, ORF-1 and ORF-1ab gene              | NP swabs                                                     |
| 24. | RealStar® SARS-CoV-2 RT-PCR Kit U.S.              | Altona Diagnostics GmbH       | E and S gene                                 | NP, OP, AN, MT, nasal swabs, nasal wash/aspirate             |
| 25. | BioCode® SARS-CoV-2 Assay                         | Applied BioCode Inc           | N gene                                       | NP, OP, nasal swabs, BAL                                     |
| 26. | Linea™ COVID-19 Real-Time PCR Assay Kit assay kit | Applied DNA Sciences          | S gene                                       | Nasal, NP, OP, AN, MT swabs, nasal, NP wash/aspirate         |
| 27. | iAMP® COVID-19 Detection Kit                      | Atila BioSystems, Inc.        | N gene and the ORF-1ab gene                  | NP, OP swabs                                                 |
| 28. | BD SARS-CoV-2 Reagents for BD MAX™ System         | Becton, Dickinson and Company | N1 and N2 genes                              | Nasal, NP, OP swabs                                          |
| 29. | BD SARS-CoV-2/Flu Reagents                        | Becton, Dickinson and Company | N1 and N2 genes and Influenza A /Influenza B | NP, AN swabs                                                 |
| 30. | BioCore 2019-nCoV Real Time PCR Kit               | BioCore Co. Ltd.              | N and RdRp genes                             | OP, NP, AN, MT swabs, Nasal, NP wash/aspirate, BAL, sputum   |

|     |                                                  |                                                       |                                        |                                                                                                |
|-----|--------------------------------------------------|-------------------------------------------------------|----------------------------------------|------------------------------------------------------------------------------------------------|
| 31. | Bio-Speedy® Direct RT-qPCR SARS-CoV-2            | Bioeksens R&D Technologies Ltd                        | ORF1ab gene                            | NP, OP swabs                                                                                   |
| 32. | BioFire® COVID-19 Test                           | BioFire Defense, LLC                                  | ORF1ab and ORF8                        | NP swabs                                                                                       |
| 33. | Biofire Respiratory Panel 2.1 (RP2.1)            | BioFire Diagnostics LLC                               | S and M genes                          | NP swabs                                                                                       |
| 34. | Biofire Respiratory Panel 2.1-EZ (RP2.1-EZ)      | BioFire Diagnostics LLC                               | S gene, M gene, Influenza A and others | NP swabs                                                                                       |
| 35. | BioGX Xfree COVID-19 Direct RT-PCR               | BioGX, Inc.                                           | N gene                                 | NP, AN, MT, OP swabs or wash                                                                   |
| 36. | Influenza SARS-CoV-2 (Flu SC2) Multiplex Assay   | Centers for Disease Control and Prevention (CDC)      | N gene                                 | NP, OP, nasal swabs, BAL, lower respiratory tract aspirates, NP wash/aspirate, nasal aspirate. |
| 37. | Biomeme SARS-CoV-2 Real-Time RT PCR              | Biomeme Inc                                           | ORF1ab and S gene                      | NP, nasal, OP swab, NP wash/aspirate, nasal aspirate                                           |
| 38. | Biomeme SARS-CoV-2 Go-Strips                     | Biomeme Inc.                                          | ORF1ab and S gene                      | Nasal, NP, OP swab, MT swab                                                                    |
| 39. | BMC-CReM COVID-19 Test                           | Boston Medical Center                                 | N1 and N2 genes                        | NP, OP, AN, MT swabs, nasal, NP wash/aspirate, BAL                                             |
| 40. | SARS-CoV-2 RNA DETECTR Assay                     | UCSF Health Clinical Laboratories, UCSF Clinical Labs | N gene                                 | NP, OP, AN, MT swabs, nasal, NP wash/aspirate                                                  |
| 41. | SARS-COV-2 R-GENE®                               | BioMérieux SA                                         | N gene and RdRp gene                   | NP, OP, AN, MT swabs, nasal aspirate/wash, BAL                                                 |
| 42. | Bio-Rad SARS-CoV-2 ddPCR Kit                     | Bio-Rad Laboratories Inc                              | N1 and N2 genes                        | NP, AN, MT swabs, nasal, NP wash/aspirate                                                      |
| 43. | Reliance SARS-CoV-2 Flu A Flu B RT-PCR Assay Kit | Bio-Rad Laboratories Inc                              | N genes and Influenza A/ Influenza B   | NP, AN swabs                                                                                   |
| 44. | Real-Q 2019-nCoV Detection Kit                   | BioSewoom, Inc.                                       | E gene and RdRp genes                  | NP, OP, nasal, MT swabs, tracheal, NP aspirate, BAL                                            |
| 45. | COVID-19 RT-PCR PNA kit                          | BioTNS                                                | RdRp gene and N genes                  | NP, OP swabs, AN, MT nasal swabs, BAL, NP wash/aspirates or nasal aspirates                    |
| 46. | Xpert® Xpress SARS-CoV-2 test                    | Cepheid                                               | N2 and E genes                         | NP, OP, nasal, MT swabs, nasal wash/aspirate                                                   |

|     |                                                      |                                                                             |                                                             |                                                                  |
|-----|------------------------------------------------------|-----------------------------------------------------------------------------|-------------------------------------------------------------|------------------------------------------------------------------|
| 47. | Xpert Xpress CoV-2/Flu/RSV plus                      | Cepheid                                                                     | RdRp and genes N2 and E and Influenza A/Influenza B/RSV RNA | Nasal, NP swabs                                                  |
| 48. | Clear Dx™ SARS-CoV-2 Test                            | Clear Labs, Inc                                                             | Sars-Cov-2 Genome                                           | NP, OP swab, AN, MT swabs, NP wash/aspirate, nasal aspirate, BAL |
| 49. | Clinomics TrioDx RT-PCR COVID-19 Test                | Clinomics USA Inc                                                           | RdRp gene and N and E genes                                 | NP, OP, MT, AN swabs                                             |
| 50. | Fulgent COVID-19 by RT-PCR test                      | Fulgent Therapeutics, LLC                                                   | N gene                                                      | Nasal, NP, OP swabs                                              |
| 51. | LOGIX SMART™ Coronavirus Disease 2019 (COVID-19) Kit | Co-Diagnostics, Inc                                                         | RdRp gene                                                   | BAL, sputum. NP, OP swabs                                        |
| 52. | Assurance SARS-CoV-2 Panel                           | Assurance Scientific Laboratories                                           | N1 and N2 genes                                             | Nasal, NP, OP swabs                                              |
| 53. | HDPCR™ SARS-CoV-2 Assay                              | ChromaCode, Inc.                                                            | N1 and N2 genes                                             | NP, OP, AN, MT swabs, nasal aspirate/wash, BAL                   |
| 54. | MobileDetect-BIO BCC19 Test Kit                      | DetectaChem LLC                                                             | N and E genes                                               | NP, OP, MT, AN swabs                                             |
| 55. | Diagnovital SARS-CoV-2 Real-Time PCR Kit             | RTA Laboratories Biological Products Pharmaceutical and Machinery Industry  | E and RdRP genes                                            | AN, MT, NP, OP swabs, NP wash/aspirates or nasal aspirates, BAL  |
| 56. | QuantiVirus SARS-CoV-2 Test kit                      | DiaCarta, Inc                                                               | N, ORF1ab and E genes                                       | Nasal, MT, NP, and OP swabs                                      |
| 57. | QuantiVirus SARS-CoV-2 Multiplex Test kit            | DiaCarta, Inc                                                               | ORF1ab gene                                                 | Nasal, NP, OP swabs, sputum                                      |
| 58. | OraRisk COVID-19 RT-PCR                              | Access Genetics, LLC                                                        | RdRp gene                                                   | Nasal, NP swabs                                                  |
| 59. | Simplexa™ COVID-19 Direct assay                      | DiaSorin Molecular LLC                                                      | ORF1ab and S genes                                          | NP, nasal swabs, BAL                                             |
| 60. | AMPIPROBE® SARS-CoV-2 Assay kit                      | Enzo Life Sciences, Inc                                                     | N1 and N2 genes                                             | NP, OP, AN, MT swabs, nasal, NP wash/aspirate                    |
| 61. | EURORealTime SARS-CoV-2                              | Euroimmun US Inc.                                                           | ORF1ab and N genes                                          | MT, NP, OP swabs, BAL                                            |
| 62. | FTD SARS-CoV-2                                       | Fast Track Diagnostics Luxembourg S.à.r.l. (a Siemens Healthineers Company) | ORF1ab and N genes                                          | Nasal, NP, OP swabs, nasal, NP wash/aspirate, BAL                |

|     |                                                                |                                          |                                                     |                                                                  |
|-----|----------------------------------------------------------------|------------------------------------------|-----------------------------------------------------|------------------------------------------------------------------|
| 63. | Advanta Dx SARS-CoV-2 RT-PCR Assay                             | Fluidigm Corporation                     | N genes                                             | NP swabs                                                         |
| 64. | GenePro SARS-CoV-2 Test                                        | Gencurix, Inc.                           | ORF1ab and E genes                                  | NP, OP, AN, MT swabs, NP wash/aspirate, nasal aspirate, BAL      |
| 65. | NeoPlex COVID-19 Detection Kit                                 | GeneMatrix, Inc.                         | RdRp and N genes                                    | NP, OP, MT, nasal swabs, sputum, BAL                             |
| 66. | Boston Heart COVID-19 RT-PCR Test                              | Boston Heart Diagnostics                 | N, S and ORF1ab genes                               | NP, OP, MT, nasal swabs, NP aspirate, BAL                        |
| 67. | Genetron SARS-CoV-2 RNA Test                                   | Genetron Health (Beijing) Co., Ltd       | ORF1ab and N genes                                  | OP, NP, AN, MT swabs                                             |
| 68. | CareStart COVID-19 MDx RT-PCR                                  | Access Bio, Inc.                         | RdRp and N genes                                    | NP, OP, nasal swabs, NP swabs                                    |
| 69. | ePlex® SARS-CoV-2 Test                                         | GenMark Diagnostics, Inc.                | N gene                                              |                                                                  |
| 70. | GS COVID-19 RT-PCR KIT                                         | GenoSensor LLC                           | ORF1ab, N and E genes                               | NP, OP, nasal, MT swabs                                          |
| 71. | Gnomegen COVID-19 RT-Digital PCR Detection Kit                 | Gnomegen LLC                             | N1 and N2 genes                                     | Nasal, NP, OP swabs                                              |
| 72. | Aptima SARS-CoV-2 assay                                        | Hologic, Inc.                            | ORF1ab Region 1 and 2                               | NP, nasal, MT, OP swabs, nasal, NP wash/aspirate                 |
| 73. | Panther Fusion SARS-CoV-2 Kit                                  | Hologic, Inc.                            | ORF1ab, S and N genes                               | NP, nasal, OP swabs, lower respiratory tract specimens           |
| 74. | Aptima SARS-CoV-2/Flu assay                                    | Hologic Inc                              | ORF1ab Region 1<br>ORF1ab Region 2<br>Influenza A/B | NP, anterior nasal swab                                          |
| 75. | Hymon™ SARS-CoV-2 Test Kit                                     | HymonBio Co. LTD                         | N and E genes                                       | NP, OP, MT, nasal swabs, BAL                                     |
| 76. | Smart Detect™ SARS-CoV-2 rRT-PCR Kit                           | InBios International, Inc                | ORF1ab, N and E genes                               | NP, AN, MT swabs                                                 |
| 77. | COV-19 IDx assay                                               | Ipsium Diagnostics, LLC                  | N gene                                              | NP, OP swabs                                                     |
| 78. | COVID-19 Coronavirus Real Time PCR Kit                         | Jiangsu Biopertectus Technologies Co Ltd | ORF1ab and N genes                                  | NP, OP, AN, MT swabs, nasal aspirates, nasal washes, BAL, sputum |
| 79. | Novel Coronavirus (SARS-CoV-2) Fast Nucleic Acid Detection Kit | Jiangsu CoWin Biotech Co., Ltd.          | ORF1ab and N genes                                  | OP swabs                                                         |
| 80. | Helix COVID-19 Test                                            | Helix OpCo LLC (dba Helix)               | N, S and ORF1ab genes                               | NP, OP, AN, MT swabs                                             |

|     |                                              |                                     |                                                                 |                                                                                |
|-----|----------------------------------------------|-------------------------------------|-----------------------------------------------------------------|--------------------------------------------------------------------------------|
| 81. | PowerChek™ 2019-nCoV Real- time PCR Kit      | Kogene Biotech Co Ltd               | RdRp and E genes                                                | NP, OP, AN, MT swabs, nasal, NP wash/aspirate, BAL, sputum                     |
| 82. | LabGun™ COVID-19 RT-PCR Kit                  | LabGenomics                         | RdRp and N genes                                                | NP, OP, AN, MT, nasal swabs, NP wash/aspirate or nasal aspirate, sputum        |
| 83. | ARIES® SARS-CoV-2 Assay Kit                  | Luminex Corporation                 | ORF1ab and N genes                                              | NP swabs                                                                       |
| 84. | NxTAG CoV Extended Panel Assay               | Luminex Molecular Diagnostics, Inc. | ORF1ab, N and E genes                                           | NP swabs                                                                       |
| 85. | LumiraDx SARS-CoV-2 RNA STAR Complete        | LumiraDx UK Ltd                     | ORF1a Gene                                                      | Upper respiratory swabs                                                        |
| 86. | SARS-CoV-2 Fluorescent PCR Kit               | Maccura Biotechnology (USA) LLC     | ORF1ab, N and E genes                                           | OP, NP, nasal, MT swabs                                                        |
| 87. | SARS-CoV-2 DETECTR Reagent Kit               | Mammoth Biosciences, Inc.           | RP and N gene                                                   | NP, OP, MT, nasal swabs, AN swabs, NP wash/aspirate, nasal aspirate            |
| 88. | Revogene SARS-CoV-2 assay                    | Meridian                            | N gene                                                          | NP, OP, AN, MT, nasal swabs                                                    |
| 89. | Accula SARS-Cov-2 Test                       | Mesa Biotech Inc.                   | N gene                                                          | Nasal swabs                                                                    |
| 90. | Gravity Diagnostics COVID-19 Assay           | Gravity Diagnostics, LLC            | N1 and N2 genes                                                 | Nasal, NP, OP swabs, BAL                                                       |
| 91. | Phosphorus COVID-19 RT-qPCR Test             | Phosphorus Diagnostics LLC          | N1 and N2 genes                                                 | Saliva                                                                         |
| 92. | NeuMoDx SARS-CoV-2 Assay                     | NeuMoDx Molecular, Inc.             | Nsp2 and N genes                                                | Nasal, NP, OP swabs                                                            |
| 93. | Hymon SARS-CoV-2 Test Kit                    | Dbas SpectronRx                     | N and E genes                                                   | Nasal, OP, NP, AN, MT swabs, BAL                                               |
| 94. | NeuMoDx Flu A-B/RSV/SARS-CoV-2 Vantage Assay | NeuMoDx Molecular, Inc.             | Nsp2 target and N gene target and Influenza A/B and RSV M genes | NP, AN swabs                                                                   |
| 95. | Kaira 2019-nCoV Detection Kit                | OPTOLANE Technologies, Inc.         | RdRp and E gene                                                 | NP, OP, AN, and MT, nasal swabs, NP wash/aspirate, nasal aspirate, sputum, BAL |
| 96. | GeneFinder™ COVID-19 Plus RealAmp Kit        | OSANG Healthcare Co., Ltd           | ORF1ab, N and E genes                                           | NP, OP, nasal, MT swabs, BAL, sputum                                           |
| 97. | OPTI SARS-CoV-2 RT PCR Test                  | OPTI Medical Systems, Inc           | N1 and N2 genes                                                 | Nasal, NP, OP swabs, sputum, TA, BAL, nasal, NP aspirate/wash                  |
| 98. | P23 Labs TaqPath SARS-CoV-2 Assay            | P23 Labs, LLC                       | N, S and ORF1ab genes                                           | OP, NP, AN, MT swabs, nasal, NP wash/aspirate, BAL                             |

|      |                                                         |                                                                                 |                        |                                                                      |
|------|---------------------------------------------------------|---------------------------------------------------------------------------------|------------------------|----------------------------------------------------------------------|
| 99.  | DiaPlexQ™ Novel Coronavirus (2019-nCoV) Detection Kit   | SolGent Co., Ltd.                                                               | ORF1a and N genes      | OP, NP, AN, MT swabs, nasal, NP wash/aspirate, BAL, sputum           |
| 100. | DetectX-Rv                                              | PathogenDx, Inc.                                                                | N genes                | NP, OP, MT, AN swabs, nasal aspirates, NP wash/aspirates, BAL        |
| 101. | PerkinElmer® New Coronavirus Nucleic Acid Detection Kit | PerkinElmer, Inc.                                                               | ORF1ab and N genes     | NP, OP swabs                                                         |
| 102. | IntelliPlex SARS-CoV-2 Detection Kit                    | PlexBio Co., Ltd.                                                               | RdRp, N and E genes    | NP, OP, AN, MT, nasal swabs, NP wash/aspirate, nasal aspirates, BAL  |
| 103. | FastPlex Triplex SARS-CoV-2 detection kit               | PreciGenome LLC                                                                 | ORF1 ab and N genes    | OP swabs                                                             |
| 104. | MD Anderson High-throughput SARS-CoV-2 RT-PCR Assay     | University of Texas MD Anderson Cancer Center, Molecular Diagnostics Laboratory | N1 and N2 genes        | NP, OP, MT, nasal swabs                                              |
| 105. | COVID-19 genesig® Real-Time PCR assay                   | Primerdesign Ltd.                                                               | ORF1 ab gene           | Nasal, OP swabs, BAL                                                 |
| 106. | PhoenixDx® 2019-nCoV                                    | Procomcure Biotech GmbH (Trax Management Services Inc.)                         | E and RdRp gene        | Nasal, NP, OP swabs, BAL                                             |
| 107. | PhoenixDx® SARS-CoV-2 Multiplex                         | Procomcure Biotech GmbH (Trax Management Services Inc.)                         | ORF1ab and N genes     | NP, OP, AN, MT swabs, BAL                                            |
| 108. | Compass Laboratory Services SARS-CoV2 Assay             | Compass Laboratory Services, LLC                                                | ORF 1ab                | NP, OP, AN, MT swabs, nasal, NP wash/aspirate                        |
| 109. | QIAstat-Dx Respiratory SARS-CoV-2 Panel                 | QIAGEN GmbH                                                                     | RdRp and E genes       | NP swabs                                                             |
| 110. | FRL SARS CoV-2 Test                                     | University of Alabama at Birmingham Fungal Reference Lab                        | N1 gene                | Nasal, NP, OP, MT, AN swabs, NP wash/aspirate, nasal aspirate, BAL   |
| 111. | DSL COVID-19 Assay                                      | Diagnostic Solutions Laboratory, LLC                                            | N1, N3 and S genes     | Nasal, MT, NP, OP swabs, BAL                                         |
| 112. | HealthQuest Esoterics TaqPath SARS-CoV-2 Assay          | HealthQuest Esoterics                                                           | ORF1ab, N, and S genes | NP, OP, AN, MT nasal swabs, NP wash/aspirate or nasal aspirates, BAL |

|      |                                                                                      |                                                                      |                                                                                                                        |                                                                                       |
|------|--------------------------------------------------------------------------------------|----------------------------------------------------------------------|------------------------------------------------------------------------------------------------------------------------|---------------------------------------------------------------------------------------|
| 113. | Clarifi COVID-19 Test Kit                                                            | Quadrant Biosciences Inc                                             | RdRp genes                                                                                                             | Saliva swabs                                                                          |
| 114. | Quest SARS-CoV-2 rRT-PCR Kit                                                         | Quest Diagnostics Infectious Disease, Inc.                           | N1 and N3 genes                                                                                                        | NP, OP swabs, sputum, tracheal aspirates, BAL                                         |
| 115. | Quest Diagnostics RC COVID-19 +Flu RT-PCR                                            | Quest Diagnostics Infectious Disease Inc                             | N1 and N3 genes                                                                                                        | Nasal swab                                                                            |
| 116. | Lyra® SARS-CoV-2 Assay                                                               | Quidel Corporation                                                   | pp1ab (non-structural polyprotein) gene                                                                                | NP, OP swabs                                                                          |
| 117. | Solana SARS-CoV-2 Assay                                                              | Quidel Corp.                                                         | Orf1ab                                                                                                                 | NP, nasal swabs                                                                       |
| 118. | New York SARS-CoV-2 Real-time Reverse Transcriptase (RT)-PCR Diagnostic Panel        | Wadsworth Center, New York State Department of Public Health's (CDC) | N1 and N2 genes                                                                                                        | NP, OP swabs, sputum                                                                  |
| 119. | Rheonix COVID-19 MDx Assay                                                           | Rheonix, Inc.                                                        | N1 gene                                                                                                                | NP, OP, AN, MT, nasal swabs, nasal wash/aspirate BAL                                  |
| 120. | CDC 2019-nCoV Real-Time RT-PCR Diagnostic Panel (CDC)                                | Centers for Disease Control and Prevention's (CDC)                   | N1 and N2 genes                                                                                                        | NP, OP swabs, sputum, lower respiratory tract aspirates, BAL, nasal, NP wash/aspirate |
| 121. | Cobas SARS-CoV-2 RT-PCR Kit                                                          | Roche Molecular Systems, Inc.                                        | ORF1 a/b                                                                                                               | Nasal, NP, OP swabs                                                                   |
| 122. | CentoFast-SARS-CoV-2 RT-PCR Assay                                                    | CENTOGENE US, LLC                                                    | E and RdRp genes                                                                                                       | OP swabs                                                                              |
| 123. | Psoma COVID-19 RT Test                                                               | Psomagen, Inc.                                                       | N1 and N2 genes                                                                                                        | Nasal, MT, NP, OP swabs, BAL                                                          |
| 124. | Cobas SARS-CoV-2 & Influenza A/B Nucleic Acid Test                                   | Roche Molecular Systems, Inc.                                        | ORF1 a/b and nucleocapsid protein gene with matrix gene of Influenza A, and non structural protein gene of Influenza B | NP, nasal swabs                                                                       |
| 125. | Novel Coronavirus (2019-nCoV) Nucleic Acid Diagnostic Kit (PCR Fluorescence Probing) | Sansure Bio Tech Inc.                                                | ORF1ab and N genes                                                                                                     | NP, OP, AN, MT swabs                                                                  |
| 126. | ScienCell™ SARS-CoV-2 Coronavirus Real-time RT-PCR (RT-qPCR) Detection Kit           | ScienCell™ Research Laboratories                                     | N1 and N2 genes                                                                                                        | Nasal, NP, OP swabs, BAL                                                              |
| 127. | STANDARD M nCoV Real-Time Detection kit                                              | SD Biosensor, Inc                                                    | ORF1ab, E genes                                                                                                        | NP, OP, nasal, MT, nasal swabs, sputum                                                |



|      |                                                                     |                                           |                          |                                                                       |
|------|---------------------------------------------------------------------|-------------------------------------------|--------------------------|-----------------------------------------------------------------------|
| 128. | U-TOP™ COVID-19 Detection Kit                                       | Seasun Biomaterials                       | ORF1ab and N genes       | OP, NP, AN, MT, nasal swabs, nasal, NP wash/aspirate, sputum          |
| 129. | AQ-TOP COVID-19 Rapid Detection Kit                                 | Seasun Biomaterials                       | ORF1ab and N gene        | OP, NP, AN, MT, nasal swabs, nasal, NP wash/aspirate, sputum          |
| 130. | Allplex™ 2019-nCoV Assay kit                                        | Seegene Inc                               | RdRp, N and E genes      | NP, OP, AN, MT swabs, sputum                                          |
| 131. | Sherlock CRISPR SARS-CoV-2 Kit                                      | Sherlock BioSciences, Inc.                | ORF1ab and N genes       | Nasal NP, OP swab, BAL                                                |
| 132. | Ezplex SARS-CoV-2 G Kit                                             | SML GENETREE Co., Ltd                     | RdRP and N genes         | NP, OP swabs, sputum                                                  |
| 133. | Talis One COVID-19 Cartridge Pack                                   | Talis Biomedical Corporation              | ORF1ab and N genes       | Nasal, MT swabs                                                       |
| 134. | ExProbe™ SARS-CoV-2 Testing Kit                                     | TBG Biotechnology Corp                    | RdRp gene, N and E genes | OP, NP, AN, MT swabs, nasal, NP wash/aspirate, BAL                    |
| 135. | TaqPath COVID-19 Combo Kit                                          | Thermo Fisher Scientific Inc              | ORF1ab, S and N genes    | NP, OP, nasal, MT swabs, NP aspirate, BAL                             |
| 136. | TaqPath COVID-19, FluA, FluB Combo Kit                              | Thermo Fisher Scientific Inc              | ORF1ab, S and N genes    | NP and AN swabs                                                       |
| 137. | TaqPath™ COVID-19 Pooling Kit                                       | Thermo Fisher Scientific Inc              | ORF1ab, S and N genes    | NP, OP, AN, MT, nasal swabs                                           |
| 138. | TaqPath COVID-19 FAST PCR Combo Kit 2.0                             | Thermo Fisher Scientific Inc              | N, ORF 1a, and ORF 1b    | Saliva                                                                |
| 139. | Amplitude™ Solution with TaqPath COVID-19 High Throughput Combo Kit | Thermo Fisher Scientific Inc              | ORF1ab, S and N genes    | AN swabs                                                              |
| 140. | COVID-19 RT-PCR peptide nucleic acid (PNA) Kit                      | TNS Co., Ltd (Bio TNS)                    | RdRp and N genes         | NP, OP, AN, MT swabs NP wash/aspirates or nasal aspirates, BAL        |
| 141. | LifeHope 2019-nCoV Real-Time RT-PCR Diagnostic Panel                | LifeHope Labs                             | N1 and N2 genes          | Nasal, MT, NP, OP swabs, BAL                                          |
| 142. | ViroKey™ SARS-CoV-2 RT-PCR Test v2.0                                | Vela Operations Singapore Pte Ltd         | Orf1a and RdRp genes     | NP, OP, AN, MT, nasal swabs, nasal or NP aspirates, nasal washes, BAL |
| 143. | SARS-CoV-2 Test Kit (Real-time PCR)                                 | Xiamen Zeesan Biotech Co., Ltd.           | ORF1ab and N genes       | NP, OP, AN, MT swabs, nasal, NP wash/aspirate, BAL                    |
| 144. | UCSD RC SARS-CoV-2 Assay                                            | University of California San Diego Health | ORF1ab gene              | Nasal, NP, OP, AN, MT swabs                                           |
| 145. | COVID-19 Nucleic Acid RT-PCR Test Kit                               | ZhuHai Sinochips Bioscience Co., Ltd      | ORF1ab and N genes       | Nasal, oral swabs                                                     |

|      |                              |                    |         |                                      |
|------|------------------------------|--------------------|---------|--------------------------------------|
| 146. | Quick SARS-CoV-2 rRT-PCR Kit | Zymo Research Corp | N genes | Upper and lower respiratory specimen |
|------|------------------------------|--------------------|---------|--------------------------------------|
